# Supplementary material for: Potential value of a rapid syndromic multiplex PCR for the diagnosis of native and prosthetic joint infections: a real-world evidence study
Source: Copernicus journal article supplement (doi:10.5194/jbji-9-87-2024), 2024-02-28
Supplement: Supplementary file [file jbji-9-87-2024-supplement.pdf]

Supplement of J. Bone Joint Infect., 9, 87–97, 2024  
<https://doi.org/10.5194/jbji-9-87-2024-supplement>  
© Author(s) 2024. CC BY 4.0 License.

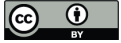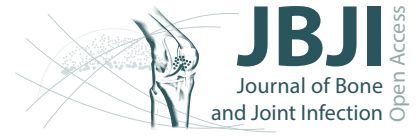

*Supplement of*

## **Potential value of a rapid syndromic multiplex PCR for the diagnosis of native and prosthetic joint infections: a real-world evidence study**

**Stéphanie Pascual et al.**

*Correspondence to:* Stéphanie Pascual ([stephanie.pascual@biomerieux.com](mailto:stephanie.pascual@biomerieux.com))

The copyright of individual parts of the supplement might differ from the article licence.

# BIOFIRE® JOINT INFECTION PANEL

## GRAM POSITIVE BACTERIA

- **Aerobes**
- *Enterococcus faecalis*
- *Enterococcus faecium*
- *Staphylococcus aureus*
- *Staphylococcus lugdunensis*
- *Streptococcus* spp.
- *Streptococcus agalactiae*
- *Streptococcus pneumoniae*
- *Streptococcus pyogenes*
- **Anaerobes**
- *Anaerococcus prevotii/vaginalis*
- *Clostridium perfringens*
- *Cutibacterium avidum/granulosum*
- *Fingoldia magna*
- *Parvimonas micra*
- *Peptoniphilus*
- *Peptostreptococcus anaerobius*

## GRAM NEGATIVE BACTERIA

- **Aerobes**
- *Citrobacter*
- *Enterobacter cloacae* complex
- *Escherichia coli*
- *Haemophilus influenzae*
- *Kingella kingae*
- *Klebsiella aerogenes*
- *Klebsiella pneumoniae* group
- *Morganella morganii*
- *Neisseria gonorrhoeae*
- *Proteus* spp.
- *Pseudomonas aeruginosa*
- *Salmonella* spp.
- *Serratia marcescens*
- **Anaerobes**
- *Bacteroides fragilis*

## YEAST

- *Candida* spp.
- *Candida albicans*

## GRAM POSITIVE RESISTANCE MARKERS

### Methicillin Resistance

- *mecA/C* and MREJ (MRSA)  
*Staphylococcus aureus*

### Vancomycin Resistance

- *van A/B*  
*Enterococcus* species

## GRAM NEGATIVE RESISTANCE MARKERS

### ESBL

- CTX-M

### Carbapenemases

- IMP
- KPC
- NDM
- OXA-48-like
- VIM

*Citrobacter*  
*Enterobacter cloacae* complex  
*K. aerogenes*  
*K. pneumoniae* group  
*M. morganii*  
*Proteus* spp  
*Salmonella*  
*S. marcescens*  
*P. Aeruginosa* (except OXA-48-like)
